# Supplementary material
Source: PubMed Central journal article supplement (PMC2722845)
Supplement: NIHMS119450-supplement-supplement_1.pdf [file NIHMS119450-supplement-supplement_1.pdf]

**Online Supplement**

**TOBACCO SMOKE EXPOSURE QUESTIONNAIRE**

**A. OCCUPATIONAL HISTORY**

**A.I. Airline Related Occupational History**

1. Have you ever been employed as an airline flight attendant? YES NO\*
- \*If you answered No, please do not complete this questionnaire as you are not eligible to participate in this study.*

2. Please tell us on which airlines and on what routes you have worked as a flight attendant. Please follow the format of the following example (use as many rows as needed):

| Airline | Domestic               |                              | International          |                              |
|---------|------------------------|------------------------------|------------------------|------------------------------|
|         | What years?<br>From To | How many<br>hours/<br>month? | What years?<br>From To | How many<br>hours/<br>month? |
| United  | 1972-1980              | 70                           | 1981-1992              | 80                           |
| United  | 1993-1999              | 40                           |                        |                              |
|         |                        |                              |                        |                              |
|         |                        |                              |                        |                              |
|         |                        |                              |                        |                              |
|         |                        |                              |                        |                              |
|         |                        |                              |                        |                              |

3. Did you fly both domestic and international routes at the same time during a period of your employment?
- YES NO\*
- \* If you answered NO, please skip to question 4.*

If yes, what years? \_\_\_\_\_

During this period, approximately what percentage of your routes was domestic and what percentage was international?

Domestic \_\_\_\_\_% International \_\_\_\_\_%

**A.II. Non-airline Related Occupational History**

4. Please list other former occupations and approximate dates of employment: *(List only occupations of at least 1 year duration; list in broad categories such as: "Business executive", "health care worker", "teacher", "bar/restaurant employees", "student")*

## Online Supplement

| Non-airline job | Dates (years) | Hours per week worked | Any smokers there who smoked around you? | Number of smokers in the same room | Average hours per day you have seen or smelled smoke at work |
|-----------------|---------------|-----------------------|------------------------------------------|------------------------------------|--------------------------------------------------------------|
|                 |               |                       |                                          |                                    |                                                              |
|                 |               |                       |                                          |                                    |                                                              |
|                 |               |                       |                                          |                                    |                                                              |
|                 |               |                       |                                          |                                    |                                                              |

5. Did you retire early from your job (airline or non-airline) due to health problems?

YES

NO\*

\* If you answered NO, please skip to question 6.

If yes, please explain? \_\_\_\_\_

### **B. MEDICAL HISTORY**

6. Has a **doctor** ever told you that you have any of the following medical problems?

| Medical Condition                | Yes | No | Age at Diagnosis |
|----------------------------------|-----|----|------------------|
| a. High blood pressure           |     |    |                  |
| b. Diabetes                      |     |    |                  |
| c. Heart Attack                  |     |    |                  |
| d. Heart Bypass surgery          |     |    |                  |
| e. Coronary Angioplasty or stent |     |    |                  |
| f. Congestive heart failure      |     |    |                  |
| g. Asthma                        |     |    |                  |
| h. Chronic bronchitis            |     |    |                  |
| i. Emphysema                     |     |    |                  |
| j. Sleep Apnea                   |     |    |                  |
| k. Lung cancer                   |     |    |                  |
| l. Breast cancer                 |     |    |                  |
| m. Thyroid disease               |     |    |                  |
| n. Sinus problems                |     |    |                  |
| o. Ear Infections                |     |    |                  |
| p. <i>Other:</i>                 |     |    |                  |
| q. <i>Other:</i>                 |     |    |                  |
| r. <i>Other:</i>                 |     |    |                  |

**Online Supplement**

6. Do you take any medications?                      YES                      NO\*  
*\*If you answered No, please go to question 7.*

| Medication Type | Date Started |
|-----------------|--------------|
|                 |              |
|                 |              |
|                 |              |
|                 |              |
|                 |              |
|                 |              |
|                 |              |
|                 |              |
|                 |              |
|                 |              |

7. Do you ever experience chest pain or discomfort with exertion:                      YES                      NO

8. Do you ever experience shortness of breath?                      YES                      NO\*  
*\*If you answered NO, please skip to question 11.*

9. Do you experience shortness of breath in bed at night?                      YES                      NO

10. Do you experience shortness of breath with regular activity?                      YES                      NO

11. Are you able to perform less physical activity than other healthy people your age?  
YES                      NO

If YES, reason: \_\_\_\_\_

12. Please choose the ONE best description of your usual level of activity:

\_\_\_\_\_ VERY ACTIVE: Running, fast walking, or other cardiovascular exercise at least once a week for 30 minutes at a time.

\_\_\_\_\_ ACTIVE: Standing or walking most of the day; lifting groceries, heavy housework, care of young children, or similar activities.

\_\_\_\_\_ SEDENTARY: Sitting most of the day, without regular physical activity, Except minor household or office tasks.

\_\_\_\_\_ LIMITED: Often stay in bed for part of the day; perform physical activity only when necessary or require assistance with household tasks.

## Online Supplement

13. Do you have a cough?

- Daily  
 Monthly  
 Rarely (2-3 times per year)  
 Never

14. Do you have nasal congestion, throat, or eye irritation, not related to a cold or hay fever?

- Daily  
 Monthly  
 Rarely (2-3 times per year)  
 Never

15. Have you been exposed to vapors, dust, gases, or fumes (OTHER than tobacco smoke) at your workplace? YES NO\*

*\*If you answered NO, please skip to question 16*

If yes, what were you exposed to? \_\_\_\_\_

If yes, for how many years were you exposed to this agent? \_\_\_\_\_

16. Are you currently exposed, for at least one hour daily, to vapors, dust, gas or fumes (other than tobacco smoke) at your workplace? YES NO

### C. SMOKING HISTORY

17. Have you ever smoked cigarettes regularly (at least 1 cigarette per day and a total of 100 cigarettes in your lifetime?) YES\* NO

*\*If you answered Yes, please do not complete this questionnaire as you are not eligible to participate in this study.*

18. Do you smoke cigarettes now? DAILY SOME DAYS NO\*

*\*if you answered NO, please skip to question 23*

19. On average, how many cigarettes per day do you smoke? (One pack = 20 cigarettes) \_\_\_\_\_cigarettes per day

20. On average, how many cigarettes per day did you smoke when you were smoking at your heaviest? \_\_\_\_\_cigarettes per day

21. How old were you when you started to smoke cigarettes regularly? \_\_\_\_\_years old

22. How old were you when you last smoked cigarettes regularly? \_\_\_\_\_years old

## Online Supplement

### **D. SECOND-HAND SMOKE EXPOSURE HISTORY**

#### **D.I. Childhood Exposure History**

23. When your mother was pregnant with you, did either of your parents smoke?

Mother          Father          Both          Neither          Don't know

24. Growing up until age 18, did anyone regularly smoke indoors in your home?

YES                      NO\*

*\*if you answered NO, please skip to question 25*

If yes, please complete the table below:

| <b>Age range<br/>(e.g., 13-16)</b> | <b>Lived with<br/>smoker<br/>(yes/no)</b> | <b>Who?<br/>(mother,<br/>father, other)</b> | <b>Hours /week spent time<br/>with other smokers? (e.g.<br/>babysitter, friends,<br/>relatives)</b> | <b>Number of<br/>hours/weeks in car<br/>with smoker?</b> |
|------------------------------------|-------------------------------------------|---------------------------------------------|-----------------------------------------------------------------------------------------------------|----------------------------------------------------------|
|                                    |                                           |                                             |                                                                                                     |                                                          |
|                                    |                                           |                                             |                                                                                                     |                                                          |
|                                    |                                           |                                             |                                                                                                     |                                                          |

#### **D.II. Adulthood Exposure History**

25. After age 18, have you ever lived with anyone who smoked cigarettes indoors in your home?

YES                      NO\*

*\*If you answered no, please skip to question 26*

If yes, please complete the table below:

| <b>Age Range<br/>(e.g., 19-24)</b> | <b>Number of people who smoked<br/>indoors in your home</b> | <b>How many packs of cigarettes did they<br/>smoke per day altogether?</b> |                 |                 |                           |
|------------------------------------|-------------------------------------------------------------|----------------------------------------------------------------------------|-----------------|-----------------|---------------------------|
|                                    |                                                             | <b><u>less than 1</u></b>                                                  | <b><u>1</u></b> | <b><u>2</u></b> | <b><u>More than 2</u></b> |
|                                    |                                                             |                                                                            |                 |                 |                           |
|                                    |                                                             |                                                                            |                 |                 |                           |
|                                    |                                                             |                                                                            |                 |                 |                           |

**Online Supplement**

26. After age 18, approximately how many hours a week did you spend in locations **other than home or work** where smoking occurred around you?

| Age Range<br>(e.g., 18-22) | Hours / Week in Each Location |          |             |               |                        |                        |
|----------------------------|-------------------------------|----------|-------------|---------------|------------------------|------------------------|
|                            | friends' home                 | In a car | Restaurants | Bars, lounges | other locations (name) | other locations (name) |
|                            |                               |          |             |               |                        |                        |
|                            |                               |          |             |               |                        |                        |
|                            |                               |          |             |               |                        |                        |

Please circle the best answer for the following questions:

27. Over the past 12 months, how often have you gone to places other than your home or work where people smoked around you indoors, close enough to see or smell the smoke?

More than once week                      More than once a month                      Less than once a month                      Never

28. Have you experienced irritation of your eyes or throat from other people's smoke?

a) At Home:    More than once week                      More than once a month                      Less than once a month                      Rarely/ Never

b) At work:    More than once week                      More than once a month                      Less than once a month                      Rarely/ Never

c) Other places:    More than once week                      More than once a month                      Less than once a month                      Rarely/ Never
